# Supplementary material for: Proteomic Profiling Reveals Cytotoxic Mechanisms of Action and Adaptive Mechanisms of Resistance in Porphyromonas gingivalis: Treatment with Juglans regia and Melaleuca alternifolia
Source: PubMed Central journal article supplement (PMC10099446; doi:10.1021/acsomega.3c00168), 2023-03-28
Supplement: ao3c00168_si_001.pdf [file ao3c00168_si_001.pdf]

## Supporting Information

### **Proteomic Profiling Reveals Cytotoxic Mechanisms of Action and Adaptive Mechanisms of Resistance in *Porphyromonas Gingivalis*: Treatment with *Juglans Regia* and *Melaleuca Alternifolia***

Afrah E. Mohammed<sup>1#</sup>, Kawther Aabed<sup>1#</sup>, Hicham Benabdelkamel<sup>2</sup>, Ashwag Shami<sup>1</sup>, Modhi Alotaibi<sup>1</sup>, Mona Al-enazi<sup>1</sup>, Assim A. Alfadda<sup>2</sup>, Ishrat Rahman<sup>3\*</sup>

<sup>1</sup> Department of Biology, College of Science, Princess Nourah bint Abdulrahman University, P.O. Box 84428, Riyadh 11671, Saudi Arabia

<sup>2</sup>Proteomics Unit, Obesity Research Center, Department of Medicine, College of Medicine, King Saud University, Riyadh 11461, Saudi Arabia

<sup>3</sup>Department of Basic Dental Sciences, College of Dentistry, Princess Nourah bint Abdulrahman University, P.O. Box 84428, Riyadh 11671, Saudi Arabia

# Authors contributed equally

\* Correspondence should be addressed [IMRahman@pnu.edu.sa](mailto:IMRahman@pnu.edu.sa)

**Figure S1.** The figure shows the different gene count obtained from STRING functional analysis  
**Table S1.** Mass spectrometry list of significant differentially abundant proteins between control, JR-treated and MA -treated samples identified in 10 samples, using 2D-DIGE. Protein name, accession number, Mascot score, MS % coverage, protein MW and pI values are listed according to Uniprot database

### Supplementary data:

**Figure S1:** The figure shows the different gene count obtained from STRING functional analysis

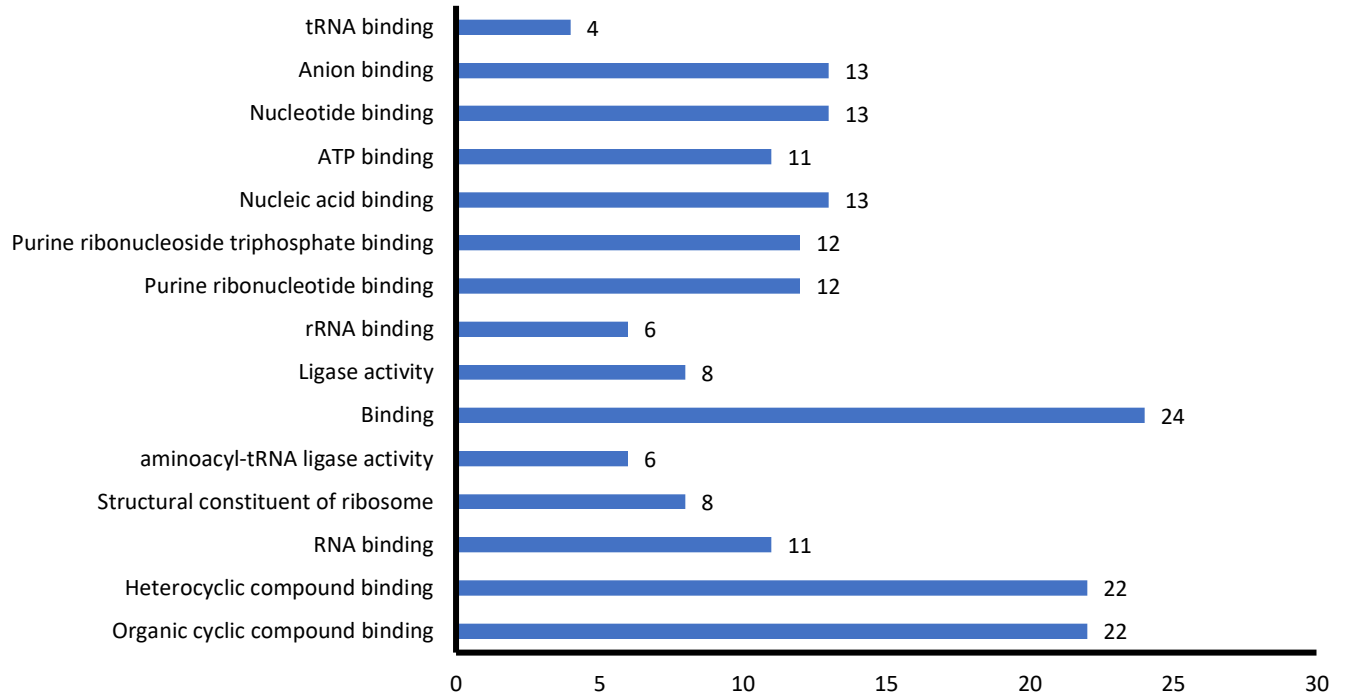

**Table S1:** Mass spectrometry list of significant differentially abundant proteins between control, JR-treated and MA -treated samples identified in 10 samples, using 2D-DIGE. Protein name, accession number, Mascot score, MS % coverage, protein MW and pI values are listed according to Uniprot database

| SI No. | Spot No <sup>a</sup> | Accession Nob | Protein Name                                                                                     | MASCOT ID   | Pi <sup>c</sup> | MW <sup>d</sup> | Cov% | Score |
|--------|----------------------|---------------|--------------------------------------------------------------------------------------------------|-------------|-----------------|-----------------|------|-------|
| 1      | 442                  | P75406        | Uncharacterized protein MPN_375                                                                  | Y375_MYCPN  | 9.95            | 15193           | 29   | 59    |
| 2      | 274                  | P12425        | Glutamine synthetase                                                                             | GLNA_BACSU  | 5.05            | 50531           | 22   | 74    |
| 3      | 261                  | C3K1L3        | Histidine-tRNA ligase                                                                            | SYH_PSEFS   | 5.61            | 48081           | 19   | 77    |
| 4      | 257                  | B2U8V1        | Peptide chain release factor 2                                                                   | RF2_RALPJ   | 4.94            | 41370.          | 16   | 62    |
| 5      | 187                  | A0KX70        | UPF0225 protein Shewana3_2159                                                                    | Y2159_SHESA | 7.59            | 19115           | 35   | 64    |
| 6      | 248                  | Q4UQF2        | ATP synthase subunit alpha                                                                       | ATPA_XANC8  | 5.32            | 55404           | 19   | 66    |
| 7      | 373                  | A0KX70        | UPF0225 protein Shewana3_2159                                                                    | Y2159_SHESA | 7.59            | 19115           | 35   | 70    |
| 8      | 202                  | Q3YQP0        | Threonine--tRNA ligase                                                                           | SYT_EHRCJ   | 6.89            | 73843           | 18   | 63    |
| 9      | 538                  | B4S6R8        | Transcriptional regulator MraZ                                                                   | MRAZ_PROA2  | 8.73            | 17890           | 55   | 66    |
| 10     | 162                  | Q0AK98        | UPF0102 protein Mmar10_3014                                                                      | Y3014_MARMM | 11.65           | 14627           | 37   | 59    |
| 11     | 413                  | C0ZIJ0        | 50S ribosomal protein L14                                                                        | RL14_BREBN  | 9.94            | 13147           | 59   | 69    |
| 12     | 355                  | B3PIT1        | ATP synthase subunit b                                                                           | ATPF_CELJU  | 5.97            | 17199           | 39   | 74    |
| 13     | 339                  | B2VCA8        | ATP synthase subunit b                                                                           | ATPF_ERWT9  | 5.40            | 17306           | 56   | 83    |
| 14     | 536                  | Q6G0H0        | ATP synthase subunit b 2                                                                         | ATPF2_BARQU | 5.17            | 18567           | 53   | 102   |
| 15     | 166                  | B6IRS0        | 30S ribosomal protein S8                                                                         | RS8_RHOCS   | 10.06           | 14774           | 49   | 66    |
| 16     | 475                  | Q5ZZC2        | UPF0178 protein lpg0089                                                                          | Y089_LEGPH  | 9.59            | 16537           | 40   | 67    |
| 17     | 299                  | A0KX70        | UPF0225 protein Shewana3_2159                                                                    | Y2159_SHESA | 7.59            | 19115           | 48   | 76    |
| 18     | 161                  | Q8RCB4        | Protein translocase subunit SecA                                                                 | SECA_THETN  | 6.05            | 103248          | 14   | 63    |
| 19     | 102                  | Q56837        | 2-hydroxypropyl-CoM lyase                                                                        | XECA_XANP2  | 5.59            | 41835           | 30   | 59    |
| 20     | 390                  | A0AJK7        | Aspartyl/glutamyl-tRNA(Asn/Gln) amidotransferase subunit B                                       | GATB_LISW6  | 5.26            | 53296           | 25   | 60    |
| 21     | 436                  | Q68XB2        | Ribosomal large subunit pseudouridine synthase C                                                 | RLUC_RICTY  | 9.54            | 34697           | 23   | 69    |
| 22     | 260                  | A8FWA5        | Cell division topological specificity factor                                                     | MINE_SHESH  | 5.63            | 10016           | 45   | 69    |
| 23     | 171                  | Q6G0H0        | ATP synthase subunit b 2                                                                         | ATPF2_BARQU | 5.17            | 18567           | 30   | 66    |
| 24     | 225                  | B2VCA8        | ATP synthase subunit b                                                                           | ATPF_ERWT9  | 5.40            | 17306           | 43   | 82    |
| 25     | 440                  | P58790        | 1-(5-phosphoribosyl)-5-[(5-phosphoribosylamino)methylideneamino]imidazole-4-carboxaide isomerase | HIS4_AGRT5  | 4.68            | 26125           | 29   | 71    |
| 26     | 211                  | Q748Z4        | 30S ribosomal protein S3                                                                         | RS3_GEOSL   | 9.97            | 23939           | 38   | 79    |
| 27     | 473                  | A9BCN5        | 50S ribosomal protein L5                                                                         | RL5_PROM4   | 10.24           | 19992           | 37   | 67    |

|    |     |        |                                                         |             |       |        |    |    |
|----|-----|--------|---------------------------------------------------------|-------------|-------|--------|----|----|
| 28 | 96  | Q8EKI6 | Sulfur carrier protein FdhD                             | FDHD_SHEON  | 6.60  | 30838  | 14 | 58 |
| 29 | 347 | A0LI67 | DNA ligase                                              | DNLJ_SYNFM  | 6.12  | 74411  | 12 | 75 |
| 30 | 459 | A0KX70 | UPF0225 protein Shewana3_2159                           | Y2159_SHESA | 7.59  | 19115  | 35 | 61 |
| 31 | 245 | Q6G0H0 | ATP synthase subunit b 2                                | ATPF2_BARQU | 5.17  | 18567  | 37 | 74 |
| 32 | 183 | A2CC49 | 30S ribosomal protein S13                               | RS13_PROM3  | 11.33 | 13702  | 40 | 64 |
| 33 | 177 | A8H5M1 | tRNA-specific 2-thiouridylase MnmA                      | MNMA_SHEPA  | 4.95  | 41646  | 24 | 61 |
| 34 | 375 | Q07N47 | Serine--tRNA ligase                                     | SYS_RHOP5   | 5.54  | 52688  | 26 | 59 |
| 35 | 397 | A8H5M1 | tRNA-specific 2-thiouridylase MnmA                      | MNMA_SHEPA  | 4.95  | 41646  | 24 | 60 |
| 36 | 242 | A1TBP9 | Glycine--tRNA ligase                                    | SYG_MYCVP   | 5.51  | 53360  | 14 | 58 |
| 37 | 385 | A8MLG8 | 30S ribosomal protein S4 A                              | RS4A_ALKOO  | 9.53  | 23540  | 28 | 59 |
| 38 | 178 | A0KX70 | UPF0225 protein Shewana3_2159                           | Y2159_SHESA | 7.59  | 19115  | 35 | 63 |
| 39 | 510 | Q8RCB4 | Protein translocase subunit SecA                        | SECA_THETN  | 6.05  | 103248 | 25 | 82 |
| 40 | 499 | Q2IYK4 | UDP-N-acetylenolpyruvoylglucosamine reductase           | MURB_RHOP2  | 6.24  | 32697  | 26 | 65 |
| 41 | 384 | B2RM15 | 50S ribosomal protein L28                               | RL28_PORG3  | 10.06 | 9118   | 53 | 62 |
| 42 | 264 | Q8L1Z9 | Glucose-6-phosphate isomerase                           | G6PI_BARHE  | 6.84  | 62734  | 23 | 61 |
| 43 | 199 | B1HUD1 | Chaperone protein DnaK                                  | DNAK_LYSSC  | 4.63  | 65320  | 28 | 66 |
| 44 | 378 | A0KX70 | UPF0225 protein Shewana3_2159                           | Y2159_SHESA | 7.59  | 19115  | 35 | 69 |
| 45 | 412 | A2BUK0 | Probable aspartoacylase                                 | ASPA_PROM5  | 8.57  | 34492  | 21 | 70 |
| 46 | 344 | Q1RH05 | 50S ribosomal protein L31                               | RL31_RICBR  | 9.34  | 8896   | 56 | 61 |
| 47 | 410 | Q2Y9Q1 | Cytochrome c biogenesis ATP-binding export protein CcmA | CCMA_NITMU  | 6.06  | 22320  | 32 | 65 |
| 48 | 561 | Q2Y9Q1 | Cytochrome c biogenesis ATP-binding export protein CcmA | RS8_LYSSC   | 9.61  | 14858  | 65 | 98 |
| 49 | 320 | Q4UNJ4 | Probable tRNA-dihydrouridine synthase                   | DUS_RICFE   | 6.97  | 35556  | 26 | 64 |
| 50 | 441 | Q8YC41 | Putative binding protein BMEII0691                      | Y3691_BRUME | 6.55  | 69344  | 20 | 64 |
| 51 | 259 | B1Y3N8 | Heat-inducible transcription repressor HrcA             | HRCAL_EPCP  | 5.57  | 37130  | 10 | 63 |
| 52 | 349 | Q3BXT9 | ATP-dependent protease ATPase subunit HslU              | HSLU_XANC5  | 5.36  | 50719  | 18 | 65 |
| 53 | 201 | A1WMG9 | Phenylalanine--tRNA ligase alpha subunit                | SYFA_VEREI  | 6.22  | 38955  | 33 | 67 |
| 54 | 280 | Q1MCV4 | Urease accessory protein UreD                           | URED_RHIL3  | 9.47  | 29300  | 24 | 60 |
| 55 | 101 | B7NU35 | tRNA/tmRNA (uracil-C(5))-methyltransferase              | TRMA_ECO7I  | 6.08  | 42231  | 19 | 58 |
| 56 | 374 | Q0AK98 | UPF0102 protein Mmar10_3014                             | Y3014_MARMM | 11.65 | 14627  | 50 | 65 |

|    |     |        |                                                                   |             |       |       |    |     |
|----|-----|--------|-------------------------------------------------------------------|-------------|-------|-------|----|-----|
| 57 | 346 | P60359 | UPF0297 protein SA1445                                            | Y1445_STAAN | 4.75  | 10297 | 48 | 61  |
| 58 | 136 | A6H2D7 | ATP synthase subunit alpha                                        | ATPA_FLAPJ  | 5.36  | 56663 | 28 | 80  |
| 59 | 444 | Q6G0H0 | ATP synthase subunit b 2                                          | ATPF2_BARQU | 5.17  | 18567 | 37 | 62  |
| 60 | 83  | A1K9S9 | NAD(P)H dehydrogenase (quinone)                                   | WRBA_AZOSB  | 6.59  | 21071 | 37 | 72  |
| 61 | 167 | B1HMZ1 | Elongation factor G                                               | EFG_LYSSC   | 5.00  | 76556 | 25 | 100 |
| 62 | 547 | Q11CT7 | Protease HtpX homolog                                             | HTPX_MESSB  | 7.98  | 33770 | 23 | 60  |
| 63 | 448 | Q824H4 | Arginine--tRNA ligase                                             | SYR_CHLCV   | 5.79  | 63869 | 15 | 60  |
| 64 | 331 | B9JG64 | Phosphoribosyl-ATP pyrophosphatase                                | HIS2_AGRRK  | 5.17  | 11351 | 57 | 70  |
| 65 | 241 | P96440 | Exopolysaccharide II synthesis transcriptional activator ExpG     | EXPG_RHIME  | 6.44  | 21828 | 30 | 63  |
| 66 | 239 | A4JCJ8 | Ribosome maturation factor RimM                                   | RIMM_BURVG  | 5.30  | 24191 | 22 | 65  |
| 67 | 417 | B8D8H7 | Chromosomal replication initiator protein DnaA                    | DNAA_BUCA5  | 9.55  | 53240 | 16 | 60  |
| 68 | 170 | B2I7W6 | Proline--tRNA ligase                                              | SYP_XYLF2   | 5.71  | 62810 | 15 | 67  |
| 69 | 401 | Q0HIJ0 | UPF0225 protein Shewmr4_2054                                      | Y2054_SHESM | 7.59  | 19118 | 35 | 68  |
| 70 | 498 | B1HVR0 | ATP-dependent Clp protease proteolytic subunit                    | CLPP_LYSSC  | 5.43  | 21671 | 47 | 79  |
| 71 | 386 | Q7VP78 | ATP-dependent Clp protease proteolytic subunit                    | CLPP_HAEDU  | 5.96  | 21716 | 40 | 68  |
| 72 | 362 | Q891M1 | Ribose import ATP-binding protein RbsA                            | RBSA_CLOTE  | 8.29  | 56749 | 15 | 60  |
| 73 | 484 | B2UV66 | 50S ribosomal protein L18                                         | RL18_HELP5  | 10.16 | 13443 | 39 | 58  |
| 74 | 188 | Q4QMD9 | Probable Fe(2+)-trafficking protein                               | FETP_HAEI8  | 6.11  | 10632 | 40 | 61  |
| 75 | 168 | B1HQV3 | GTP-sensing transcriptional pleiotropic repressor CodY            | CODY_LYSSC  | 5.09  | 28929 | 24 | 68  |
| 76 | 301 | B1HM56 | ATP synthase subunit beta                                         | ATPB_LYSSC  | 4.80  | 51243 | 30 | 85  |
| 77 | 235 | A4X4J3 | Elongation factor Ts                                              | EFTS_SALTO  | 5.38  | 29776 | 23 | 69  |
| 78 | 389 | Q8EK81 | Elongation factor Tu 1                                            | EFTU1_SHEON | 5.13  | 43605 | 37 | 61  |
| 79 | 364 | A4WQX2 | Ribose-5-phosphate isomerase A                                    | RPIA_RHOS5  | 4.86  | 27093 | 22 | 79  |
| 80 | 142 | Q1IIG4 | ATP synthase subunit b                                            | ATPF_ACIBL  | 5.44  | 26005 | 35 | 71  |
| 81 | 534 | Q2YN11 | GTP pyrophosphokinase rsh                                         | RSH_BRUA2   | 8.11  | 83975 | 21 | 71  |
| 82 | 548 | A2RPN0 | 3-demethoxyubiquinol 3-hydroxylase                                | COQ7_HERSE  | 5.99  | 22962 | 37 | 59  |
| 83 | 509 | Q11KL2 | Acetyl-coenzyme A carboxylase carboxyl transferase subunit beta   | ACCD_MESSB  | 6.06  | 33962 | 19 | 80  |
| 84 | 340 | Q2RWE4 | 4-hydroxy-3-methylbut-2-en-1-yl diphosphate synthase (flavodoxin) | ISPG_RHORT  | 5.93  | 41216 | 19 | 60  |

|    |     |        |                                               |            |      |       |    |    |
|----|-----|--------|-----------------------------------------------|------------|------|-------|----|----|
| 85 | 553 | B1W3Y6 | Adenylate kinase                              | KAD_STRGG  | 4.88 | 23699 | 41 | 64 |
| 86 | 129 | B9DPG4 | Tyrosine recombinase XerC                     | XERC_STACT | 9.37 | 34779 | 27 | 60 |
| 87 | 110 | B0BAD4 | Elongation factor Ts                          | EFTS_CHLTB | 5.52 | 31005 | 24 | 63 |
| 88 | 105 | O67904 | Glutamyl-tRNA(Gln) amidotransferase subunit C | GATC_AQUAE | 4.44 | 11208 | 31 | 59 |

<sup>a</sup> Spot numbers.

<sup>b</sup> Protein accession number for SWISSPROT Database.

<sup>c</sup> Theoretical isoelectric point.

<sup>d</sup> Theoretical relative mass.

<sup>e</sup> MASCOT score
